# Supplementary material for: Polymethacrylic acid–facilitated nanofiber matrix loading Ag nanoparticles for SERS measurements
Source: Royal Society of Chemistry journal article supplement (doi:10.1039/c4ra05737f), 2014-01-01
Supplement: c4ra05737f1.pdf [file c4ra05737f1.pdf]

# Electronic Supporting Information

*for*

## Polymethacrylic acid–facilitated nanofiber matrix loading Ag nanoparticles for SERS measurements

Hui Yang,<sup>a</sup> and Chengzhi Huang<sup>\* a,b</sup>

<sup>a</sup>Key Laboratory of Luminescence and Real-Time Analytical Chemistry (Southwest University),  
Ministry of Education, College of Chemistry and Chemical Engineering, Southwest University,  
Chongqing 400715, China

<sup>b</sup>College of Pharmaceutical Science, Southwest University, Chongqing 400715, China

E-mail: chengzhi@swu.edu.cn (C. Z. H.)

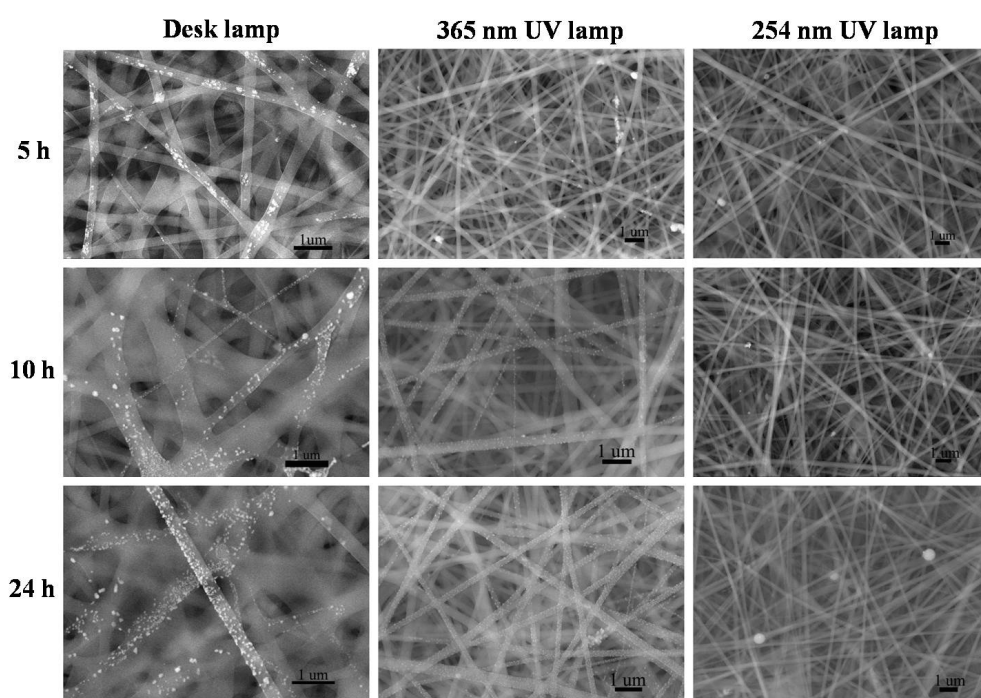

**Fig. S1** SEM images of electrospun fiber mats from the AgNO<sub>3</sub>/PMAA/PVP solution that had

been illuminated by different light sources for different illuminated time.

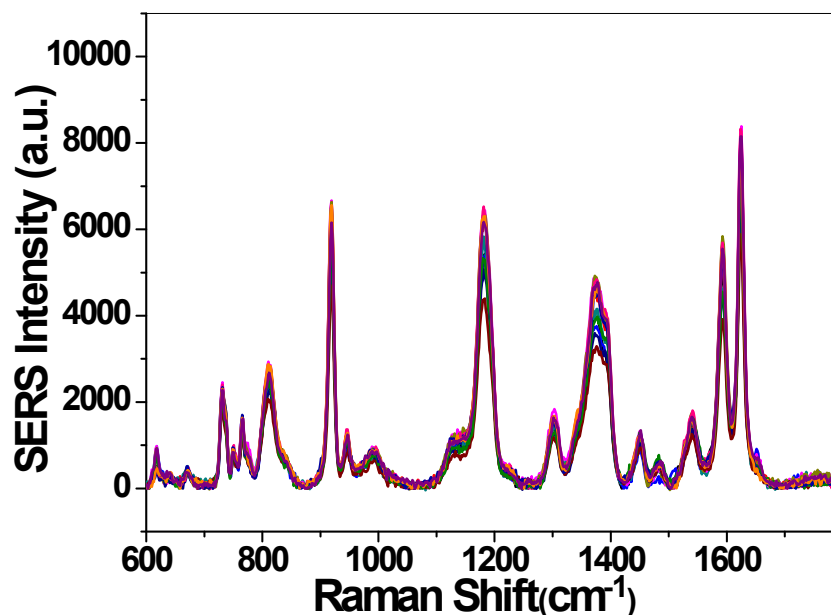

**Fig. S2** RSD-SERS spectra of  $10^{-6}$  M CV solutions collected on the randomly selected thirteen places of the optimized substrate. Ag: MAA concentration is 400:1, the as-prepared elecspun reduced by desk lamp, and the acquisition time is 1 s.

**Table S1** RSD values for the major peaks of the CV SERS spectrum

| Peak position (cm <sup>-1</sup> ) | 799    | 912    | 1174   | 1382   | 1620   |
|-----------------------------------|--------|--------|--------|--------|--------|
| RSD value                         | 0.1152 | 0.1186 | 0.1198 | 0.1167 | 0.1175 |

**Table S2** Results for the determination of MG in fishery water.

| Sample          | Found<br>( $\mu\text{mol/L}$ ) | Added<br>( $\mu\text{mol/L}$ ) | Total<br>( $\mu\text{mol/L}$ ) | Recovery<br>(%) | RSD<br>(%, n=4) |
|-----------------|--------------------------------|--------------------------------|--------------------------------|-----------------|-----------------|
| Fishery water 1 | 2.1                            | 20                             | 20.9                           | 94              | 8.5             |
| Fishery water 2 | 1.9                            | 20                             | 22.4                           | 102.5           | 3.0             |
